# Supplementary material
Source: ML conference proceedings conference paper supplement (https://openreview.net/forum?id=rZxwa8JkJW)
Supplement: supplementary_material [file attachment]

# Instructions

**Task:** you will see an input image and an output image that has multiple edits applied to it. Your task is to write an edit summary.

**Edit summary:** summarize the overall difference between images in **one short sentence**.

- Use proper grammar and avoid spelling mistakes.
- You can group up or omit differences in **Edit summary**, but make sure it is still an accurate **summary**
- Make sure that the words like "added", "replaced", "removed" are used appropriately.
- **Do NOT** start the sentences with "The difference is" or "There is" etc.
- **Do NOT** refer to and compare the images as "The left/right image" or "The first/second image"

## Example 1

| original                                                                            | edited                                                                               |
|-------------------------------------------------------------------------------------|--------------------------------------------------------------------------------------|
|  |  |

**Edit summary:** The avocados are replaced with a pineapple, a banana and rubber gloves.

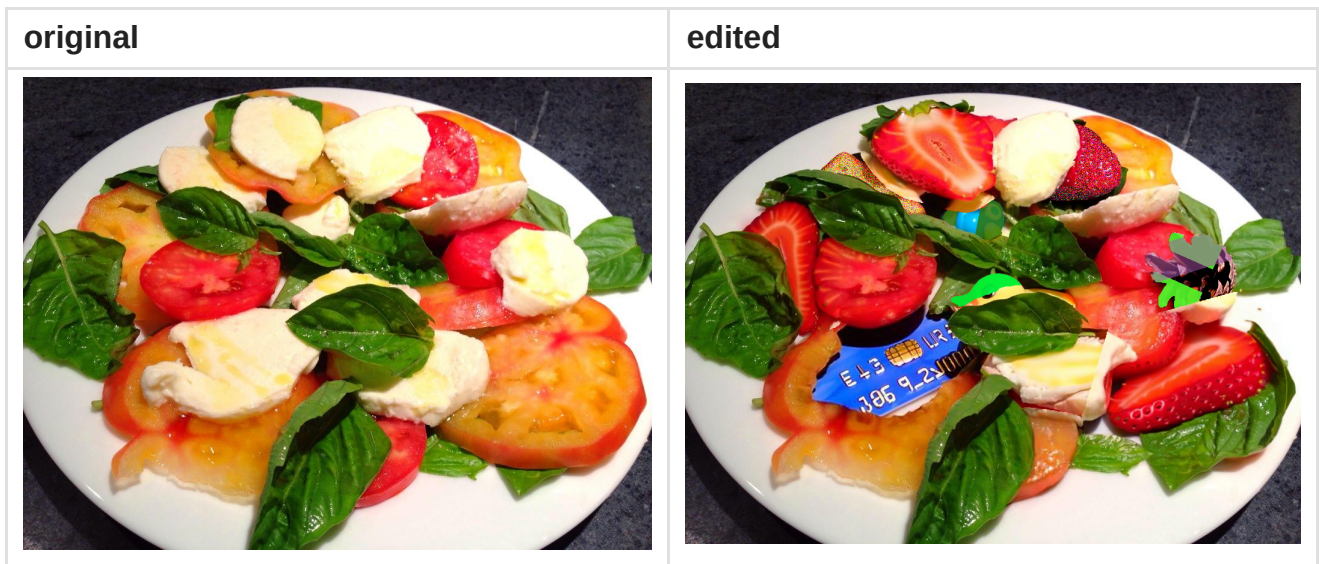

**Edit summary:** Some slices of cheese and tomato are replaced with strawberries and various other objects.

3

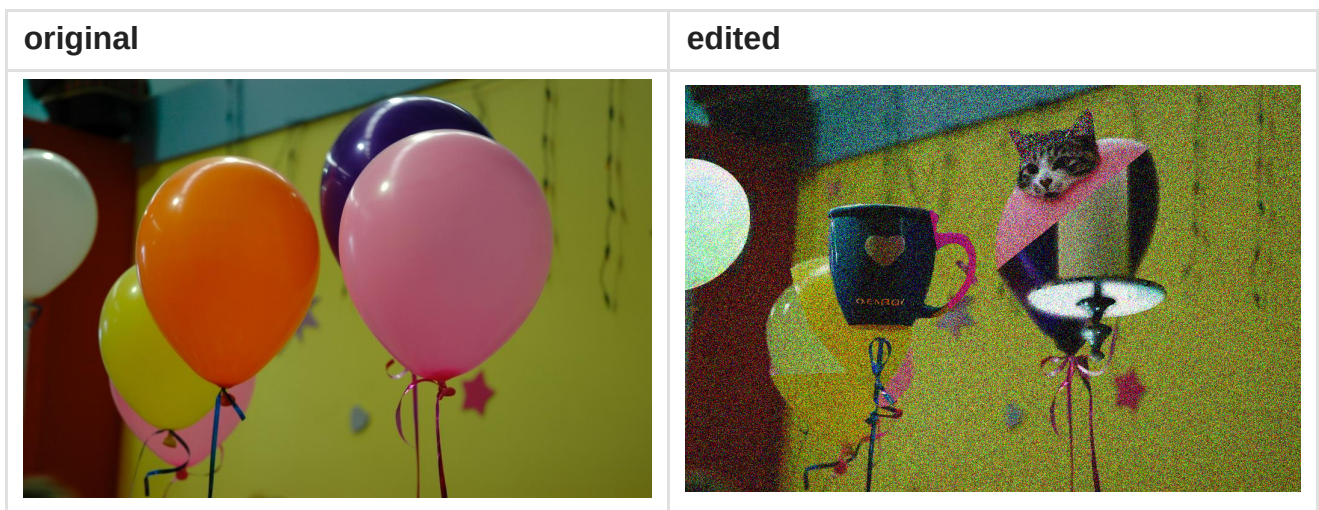

**Edit summary:** The image is noisy and balloons are replaced with a mug, a candle and a cat.

4



original

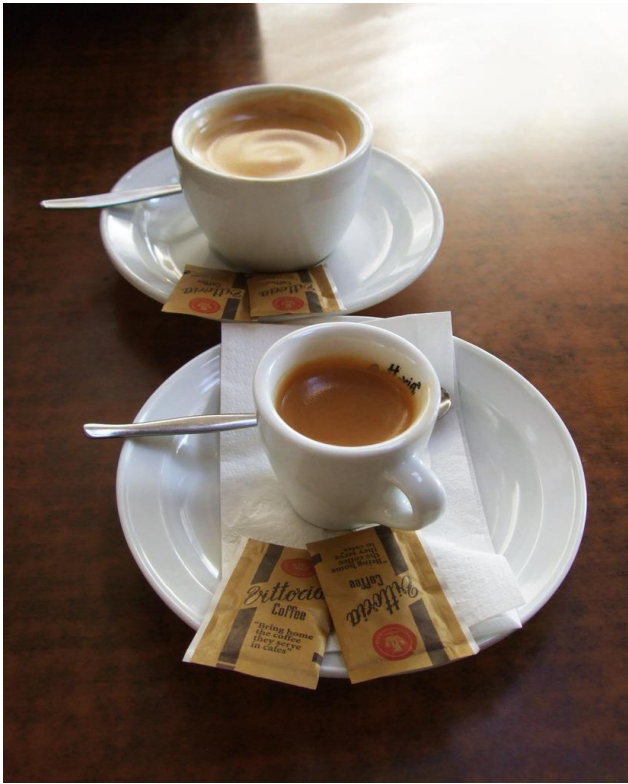

edited

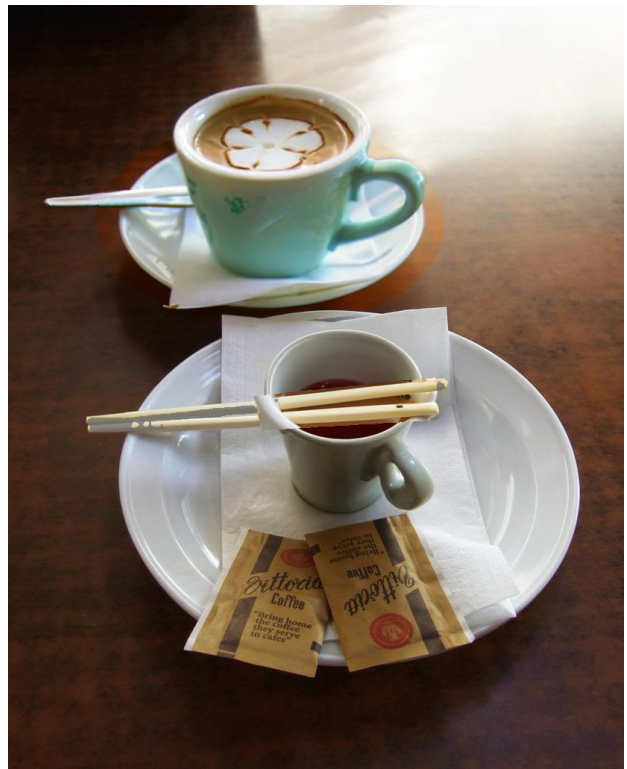

**Edit summary:** The mugs are slightly different and there are chopsticks piercing one of them.
